# Supplementary material for: Aggregation-induced emission mesogens formed by intermolecular hydrogen bonding of 4-alkyl-4′-cyanobiphenyl molecules
Source: Royal Society of Chemistry journal article supplement (doi:10.1039/d3tc01468a), 2023-01-01
Supplement: d3tc01468a1.pdf [file d3tc01468a1.pdf]

## Supplementary Information

# Aggregation-Induced Emission Mesogens Formed by Intermolecular Hydrogen Bonding of 4-Alkyl 4'- Cyanobiphenyl Molecules

Po-Ting Chou,<sup>a,b</sup> Tsung Yang Ho,<sup>b</sup> Jia-Ying Cai,<sup>b</sup> Huang-Teng Lin,<sup>b</sup> Chung-Hung Hsieh<sup>b</sup> and  
Chih-Hsin Chen<sup>\*b</sup>

<sup>a</sup>Department of Chemistry, Chinese Culture University, Taipei City 11114, Taiwan

<sup>b</sup>Department of Chemistry, Tamkang University, New Taipei City 251301, Taiwan

\*Corresponding authors: [chc@mail.tku.edu.tw](mailto:chc@mail.tku.edu.tw) (Chih-Hsin Chen)

### Contents

1. DSC analysis
2. Single Crystal X-ray Structures and Crystal Data
3. Synthesis and Characterization of the Molecules
4. Theoretical Calculation
5. <sup>1</sup>H and <sup>13</sup>C NMR spectra



## 1. DSC analysis

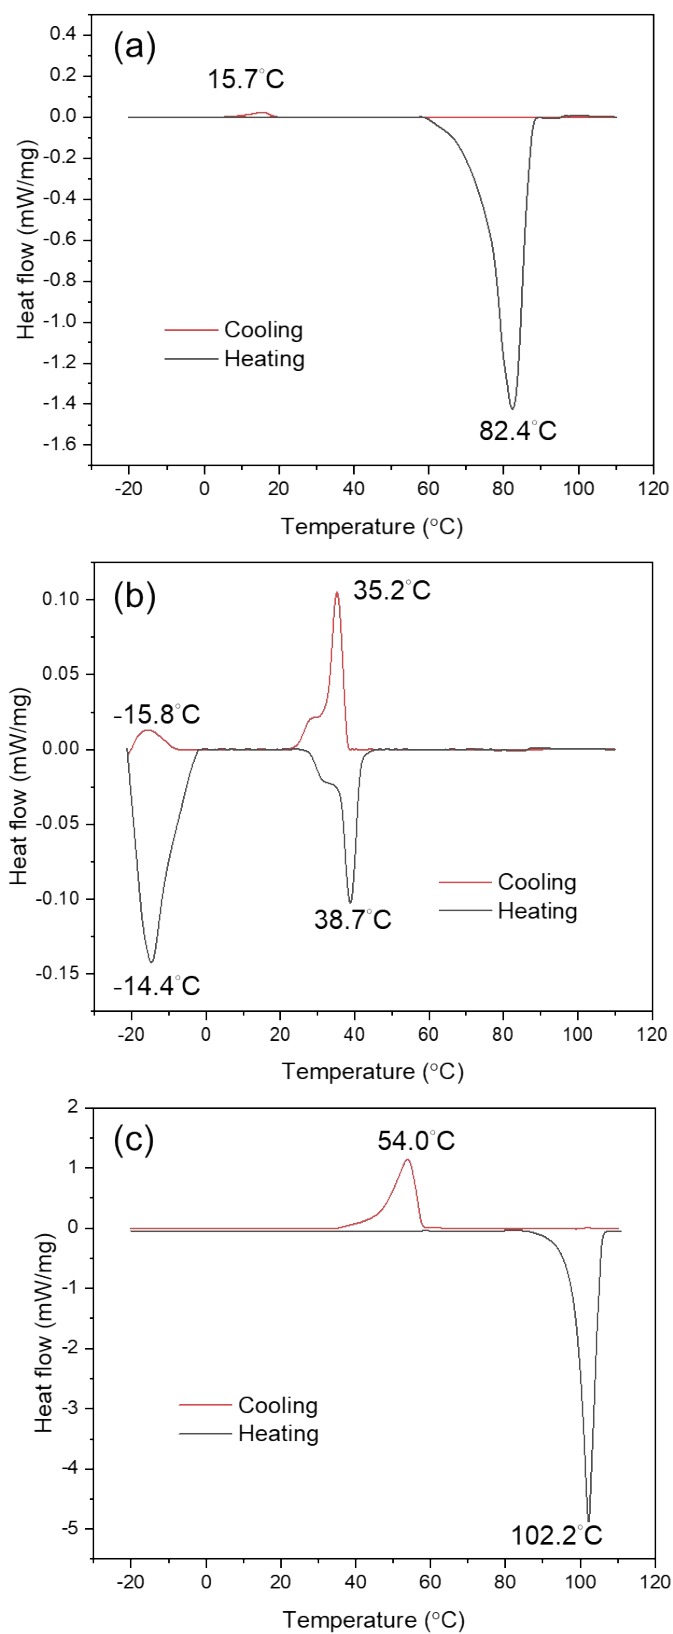

Fig. S1. The DSC thermograms of (a) 2CB-NC20, (b) 2CB-NC30, and (c) 2CB-NC40. The scan rate was 10°C/min.

## 2. Single Crystal X-ray Structures and Crystal Data

The crystals of complexes **2CB-NC2O** and **2CB-NC4O** chosen for X-ray diffraction studies are measured in sizes of  $0.20 \times 0.08 \times 0.8$  mm and  $0.30 \times 0.05 \times 0.05$  mm, respectively. Each crystal was mounted on a glass fiber and quickly coated in epoxy resin. Unit-cell parameters were obtained by least-squares refinement. Diffraction measurements for complexes **2CB-NC2O** and **2CB-NC4O** were carried out on a Bruker SMART Apex CCD diffractometers using graphite-monochromated Mo K $\alpha$  radiation ( $\lambda = 0.7107$  Å) and between  $2.43^\circ$  and  $25.94^\circ$  for complex **2CB-NC2O**, between  $2.83^\circ$  and  $28.39^\circ$  for complex **2CB-NC4O**. The space groups were determined on the basis of systematic absences and intensity statistics. The structures were solved by direct methods and refined by full-matrix least-squares on  $F^2$ . Anisotropic displacement parameters were determined for all nonhydrogen atoms. Hydrogen atoms were mixed treatment in the least-squares refinement. The following is a list of programs used: data collection and cell refinement, APEX2;<sup>a</sup> data reductions, SAINTPLUS Version 6.63;<sup>b</sup> absorption correction, SADABAS;<sup>c</sup> structural solutions, SHELXS-97;<sup>d</sup> structural refinement, SHELXL-97;<sup>e</sup> graphics and publication materials, Mercury Version 2.3.<sup>f</sup> Full crystal data has been deposited at the Chambridge Crystallographic Data Centre (CCDC2219044 and CCDC2219045).

- a. *APEX2*, version 2009.7-0; Bruker AXS, Inc.: Madison, WI, 2007.
- b. *SAINTPPLUS*: Program for Reduction of Area Detector Data, 1034 version 6.63; Bruker AXS Inc.: Madison, WI, 2007.
- c. Sheldrick, G. M. *SADABS: Program for Absorption Correction of 1036 Area Detector Frames*; Bruker AXS Inc.: Madison, WI, 2001.
- d. Sheldrick, G. M. *SHELXS-97: Program for Crystal Structure 1038 Solution*; Universitat Go ¨ttingen: Göttingen, Germany, 1997.

- e. Sheldrick, G. M., *SHELXL-97: Program for Crystal Structure 1040 Refinement*; Universitat Göttingen: Göttingen, Germany, 1997.
- f. Macrae, C. F.; Edgington, P. R.; McCabe, P.; Pidcock, E.; Shields, G. P.; Taylor, R.; Towler, M. and van de Streek, J., *J. Appl. Crystallogr.* 2006, **39**, 453–457.

**Table S1.** Crystal data and structure refinement for **2CB-NC2O**

|                                   |                                                                                       |
|-----------------------------------|---------------------------------------------------------------------------------------|
| Identification code               | tat6_0m-auto                                                                          |
| Empirical formula                 | C <sub>34</sub> H <sub>38</sub> N <sub>4</sub> O <sub>2</sub>                         |
| Formula weight                    | 534.68                                                                                |
| Temperature                       | 150(2) K                                                                              |
| Wavelength                        | 0.71073 Å                                                                             |
| Crystal system                    | Monoclinic                                                                            |
| Space group                       | P21/c                                                                                 |
| Unit cell dimensions              | a = 9.259(3) Å a = 90°.<br>b = 15.873(5) Å b = 96.57(2)°.<br>c = 19.879(5) Å g = 90°. |
| Volume                            | 2902.3(14) Å <sup>3</sup>                                                             |
| Z                                 | 4                                                                                     |
| Density (calculated)              | 1.224 Mg/m <sup>3</sup>                                                               |
| Absorption coefficient            | 0.077 mm <sup>-1</sup>                                                                |
| F(000)                            | 1144                                                                                  |
| Crystal size                      | 0.2 x 0.08 x 0.08 mm <sup>3</sup>                                                     |
| Theta range for data collection   | 2.43 to 25.94°.                                                                       |
| Index ranges                      | -9 ≤ h ≤ 11, -19 ≤ k ≤ 18, -24 ≤ l ≤ 24                                               |
| Reflections collected             | 33247                                                                                 |
| Independent reflections           | 5671 [R(int) = 0.0680]                                                                |
| Completeness to theta = 25.94°    | 99.8 %                                                                                |
| Absorption correction             | Semi-empirical from equivalents                                                       |
| Max. and min. transmission        | 0.9805 and 0.8272                                                                     |
| Refinement method                 | Full-matrix least-squares on F <sup>2</sup>                                           |
| Data / restraints / parameters    | 5671 / 0 / 377                                                                        |
| Goodness-of-fit on F <sup>2</sup> | 0.918                                                                                 |
| Final R indices [I > 2σ(I)]       | R1 = 0.0634, wR2 = 0.2104                                                             |
| R indices (all data)              | R1 = 0.1251, wR2 = 0.2767                                                             |
| Largest diff. peak and hole       | 0.328 and -0.360 e.Å <sup>-3</sup>                                                    |

**Table S2.** Bond lengths [Å] and angles [°] for **2CB-NC2O**

|             |          |              |          |
|-------------|----------|--------------|----------|
| O(1)-C(1)   | 1.415(3) | C(12)-C(14)  | 1.382(4) |
| O(1)-H(4)   | 0.87(4)  | C(12)-C(13)  | 1.441(4) |
| O(2)-C(18)  | 1.414(4) | C(14)-C(15)  | 1.377(4) |
| O(2)-H(3)   | 0.89(4)  | C(14)-H(14)  | 0.9500   |
| N(1)-C(3)   | 1.458(3) | C(15)-H(15)  | 0.9500   |
| N(1)-C(2)   | 1.461(3) | C(16)-C(17)  | 1.379(4) |
| N(2)-C(13)  | 1.133(4) | C(16)-H(16)  | 0.9500   |
| N(3)-C(20)  | 1.463(3) | C(17)-H(17)  | 0.9500   |
| N(3)-C(19)  | 1.459(3) | C(18)-C(19)  | 1.494(4) |
| N(4)-C(30)  | 1.147(4) | C(18)-H(18A) | 0.9900   |
| C(1)-C(2)   | 1.503(4) | C(18)-H(18B) | 0.9900   |
| C(1)-H(1A)  | 0.9900   | C(19)-H(19A) | 0.9900   |
| C(1)-H(1B)  | 0.9900   | C(19)-H(19B) | 0.9900   |
| C(2)-H(2A)  | 0.9900   | C(20)-C(21)  | 1.513(4) |
| C(2)-H(2B)  | 0.9900   | C(20)-H(20A) | 0.9900   |
| C(3)-C(4)   | 1.512(4) | C(20)-H(20B) | 0.9900   |
| C(3)-H(3A)  | 0.9900   | C(21)-C(22)  | 1.501(4) |
| C(3)-H(3B)  | 0.9900   | C(21)-H(21A) | 0.9900   |
| C(4)-C(5)   | 1.508(3) | C(21)-H(21B) | 0.9900   |
| C(4)-H(4A)  | 0.9900   | C(22)-C(32)  | 1.378(4) |
| C(4)-H(4B)  | 0.9900   | C(22)-C(23)  | 1.388(4) |
| C(5)-C(17)  | 1.384(4) | C(23)-C(24)  | 1.378(4) |
| C(5)-C(6)   | 1.388(4) | C(23)-H(23)  | 0.9500   |
| C(6)-C(7)   | 1.385(4) | C(24)-C(25)  | 1.398(4) |
| C(6)-H(6)   | 0.9500   | C(24)-H(24)  | 0.9500   |
| C(7)-C(8)   | 1.392(4) | C(25)-C(31)  | 1.385(4) |
| C(7)-H(7)   | 0.9500   | C(25)-C(26)  | 1.475(4) |
| C(8)-C(16)  | 1.390(4) | C(26)-C(34)  | 1.399(4) |
| C(8)-C(9)   | 1.475(4) | C(26)-C(27)  | 1.395(4) |
| C(9)-C(15)  | 1.390(4) | C(27)-C(28)  | 1.372(4) |
| C(9)-C(10)  | 1.395(4) | C(27)-H(27)  | 0.9500   |
| C(10)-C(11) | 1.376(4) | C(28)-C(29)  | 1.396(4) |
| C(10)-H(10) | 0.9500   | C(28)-H(28)  | 0.9500   |
| C(11)-C(12) | 1.386(4) | C(29)-C(33)  | 1.385(4) |
| C(11)-H(11) | 0.9500   | C(29)-C(30)  | 1.437(4) |

|                  |          |                    |          |
|------------------|----------|--------------------|----------|
| C(31)-C(32)      | 1.375(4) | C(7)-C(6)-C(5)     | 121.2(3) |
| C(31)-H(31)      | 0.9500   | C(7)-C(6)-H(6)     | 119.4    |
| C(32)-H(32)      | 0.9500   | C(5)-C(6)-H(6)     | 119.4    |
| C(33)-C(34)      | 1.369(4) | C(6)-C(7)-C(8)     | 121.6(2) |
| C(33)-H(33)      | 0.9500   | C(6)-C(7)-H(7)     | 119.2    |
| C(34)-H(34)      | 0.9500   | C(8)-C(7)-H(7)     | 119.2    |
|                  |          | C(7)-C(8)-C(16)    | 117.1(2) |
| C(1)-O(1)-H(4)   | 112(2)   | C(7)-C(8)-C(9)     | 121.3(2) |
| C(18)-O(2)-H(3)  | 113(3)   | C(16)-C(8)-C(9)    | 121.5(2) |
| C(3)-N(1)-C(2)   | 111.1(2) | C(15)-C(9)-C(10)   | 117.1(2) |
| C(20)-N(3)-C(19) | 111.6(2) | C(15)-C(9)-C(8)    | 121.8(2) |
| O(1)-C(1)-C(2)   | 112.8(2) | C(10)-C(9)-C(8)    | 121.1(2) |
| O(1)-C(1)-H(1A)  | 109.0    | C(11)-C(10)-C(9)   | 121.6(2) |
| C(2)-C(1)-H(1A)  | 109.0    | C(11)-C(10)-H(10)  | 119.2    |
| O(1)-C(1)-H(1B)  | 109.0    | C(9)-C(10)-H(10)   | 119.2    |
| C(2)-C(1)-H(1B)  | 109.0    | C(12)-C(11)-C(10)  | 120.2(3) |
| H(1A)-C(1)-H(1B) | 107.8    | C(12)-C(11)-H(11)  | 119.9    |
| N(1)-C(2)-C(1)   | 112.3(2) | C(10)-C(11)-H(11)  | 119.9    |
| N(1)-C(2)-H(2A)  | 109.1    | C(11)-C(12)-C(14)  | 119.1(2) |
| C(1)-C(2)-H(2A)  | 109.1    | C(11)-C(12)-C(13)  | 120.0(3) |
| N(1)-C(2)-H(2B)  | 109.1    | C(14)-C(12)-C(13)  | 120.8(3) |
| C(1)-C(2)-H(2B)  | 109.1    | N(2)-C(13)-C(12)   | 177.6(3) |
| H(2A)-C(2)-H(2B) | 107.9    | C(15)-C(14)-C(12)  | 120.2(3) |
| N(1)-C(3)-C(4)   | 112.6(2) | C(15)-C(14)-H(14)  | 119.9    |
| N(1)-C(3)-H(3A)  | 109.1    | C(12)-C(14)-H(14)  | 119.9    |
| C(4)-C(3)-H(3A)  | 109.1    | C(14)-C(15)-C(9)   | 121.7(3) |
| N(1)-C(3)-H(3B)  | 109.1    | C(14)-C(15)-H(15)  | 119.1    |
| C(4)-C(3)-H(3B)  | 109.1    | C(9)-C(15)-H(15)   | 119.1    |
| H(3A)-C(3)-H(3B) | 107.8    | C(17)-C(16)-C(8)   | 121.0(2) |
| C(5)-C(4)-C(3)   | 115.4(2) | C(17)-C(16)-H(16)  | 119.5    |
| C(5)-C(4)-H(4A)  | 108.4    | C(8)-C(16)-H(16)   | 119.5    |
| C(3)-C(4)-H(4A)  | 108.4    | C(16)-C(17)-C(5)   | 122.1(2) |
| C(5)-C(4)-H(4B)  | 108.4    | C(16)-C(17)-H(17)  | 119.0    |
| C(3)-C(4)-H(4B)  | 108.4    | C(5)-C(17)-H(17)   | 119.0    |
| H(4A)-C(4)-H(4B) | 107.5    | O(2)-C(18)-C(19)   | 112.5(3) |
| C(17)-C(5)-C(6)  | 117.1(2) | O(2)-C(18)-H(18A)  | 109.1    |
| C(17)-C(5)-C(4)  | 119.8(2) | C(19)-C(18)-H(18A) | 109.1    |
| C(6)-C(5)-C(4)   | 123.1(2) | O(2)-C(18)-H(18B)  | 109.1    |

|                     |          |                   |          |
|---------------------|----------|-------------------|----------|
| C(19)-C(18)-H(18B)  | 109.1    | C(31)-C(25)-C(24) | 116.3(2) |
| H(18A)-C(18)-H(18B) | 107.8    | C(31)-C(25)-C(26) | 121.4(2) |
| N(3)-C(19)-C(18)    | 112.5(2) | C(24)-C(25)-C(26) | 122.2(2) |
| N(3)-C(19)-H(19A)   | 109.1    | C(34)-C(26)-C(27) | 117.4(2) |
| C(18)-C(19)-H(19A)  | 109.1    | C(34)-C(26)-C(25) | 121.7(2) |
| N(3)-C(19)-H(19B)   | 109.1    | C(27)-C(26)-C(25) | 120.9(2) |
| C(18)-C(19)-H(19B)  | 109.1    | C(28)-C(27)-C(26) | 121.3(3) |
| H(19A)-C(19)-H(19B) | 107.8    | C(28)-C(27)-H(27) | 119.3    |
| N(3)-C(20)-C(21)    | 113.1(2) | C(26)-C(27)-H(27) | 119.3    |
| N(3)-C(20)-H(20A)   | 109.0    | C(27)-C(28)-C(29) | 120.2(3) |
| C(21)-C(20)-H(20A)  | 109.0    | C(27)-C(28)-H(28) | 119.9    |
| N(3)-C(20)-H(20B)   | 109.0    | C(29)-C(28)-H(28) | 119.9    |
| C(21)-C(20)-H(20B)  | 109.0    | C(33)-C(29)-C(28) | 119.2(3) |
| H(20A)-C(20)-H(20B) | 107.8    | C(33)-C(29)-C(30) | 121.5(3) |
| C(22)-C(21)-C(20)   | 114.6(2) | C(28)-C(29)-C(30) | 119.3(3) |
| C(22)-C(21)-H(21A)  | 108.6    | N(4)-C(30)-C(29)  | 178.1(4) |
| C(20)-C(21)-H(21A)  | 108.6    | C(25)-C(31)-C(32) | 122.4(3) |
| C(22)-C(21)-H(21B)  | 108.6    | C(25)-C(31)-H(31) | 118.8    |
| C(20)-C(21)-H(21B)  | 108.6    | C(32)-C(31)-H(31) | 118.8    |
| H(21A)-C(21)-H(21B) | 107.6    | C(22)-C(32)-C(31) | 121.4(3) |
| C(32)-C(22)-C(23)   | 116.8(2) | C(22)-C(32)-H(32) | 119.3    |
| C(32)-C(22)-C(21)   | 122.9(2) | C(31)-C(32)-H(32) | 119.3    |
| C(23)-C(22)-C(21)   | 120.3(2) | C(34)-C(33)-C(29) | 120.1(3) |
| C(24)-C(23)-C(22)   | 122.2(3) | C(34)-C(33)-H(33) | 119.9    |
| C(24)-C(23)-H(23)   | 118.9    | C(29)-C(33)-H(33) | 119.9    |
| C(22)-C(23)-H(23)   | 118.9    | C(33)-C(34)-C(26) | 121.7(3) |
| C(23)-C(24)-C(25)   | 120.8(3) | C(33)-C(34)-H(34) | 119.2    |
| C(23)-C(24)-H(24)   | 119.6    | C(26)-C(34)-H(34) | 119.2    |
| C(25)-C(24)-H(24)   | 119.6    |                   |          |

---

Symmetry transformations used to generate equivalent atoms:



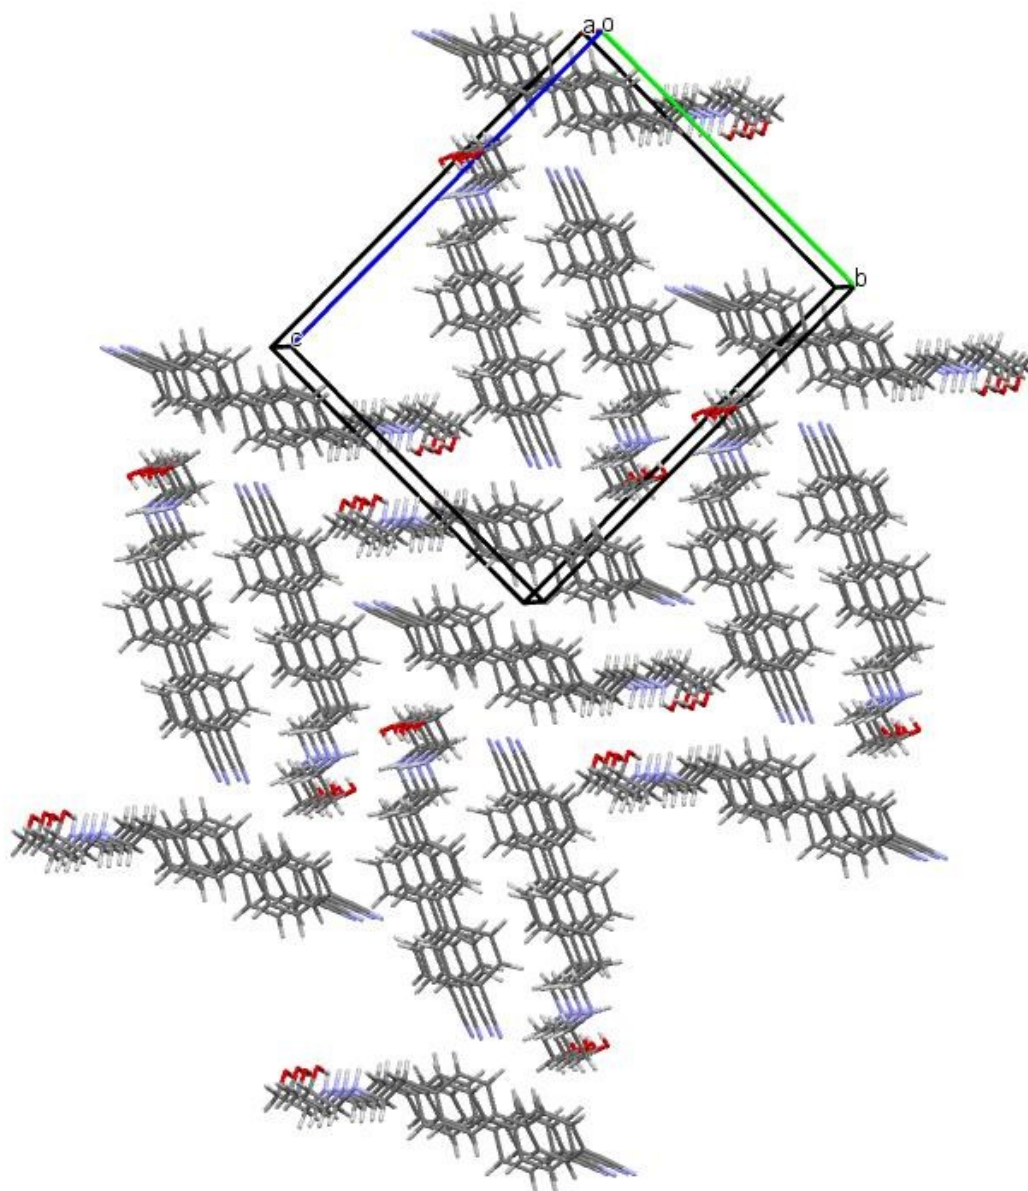

Fig. S2. The packing diagram of 2CB-NC2O alone with an axis in the size of 2\*2\*2 unit cell.

**Table S3.** Crystal data and structure refinement for **2CB-NC40**

|                      |                         |
|----------------------|-------------------------|
| Identification code  | tat21b_0m-auto          |
| Empirical formula    | C19 H22 N2 O            |
| Formula weight       | 294.39                  |
| Temperature          | 150(2) K                |
| Wavelength           | 0.71073 Å               |
| Crystal system       | Monoclinic              |
| Space group          | P21/n                   |
| Unit cell dimensions | a = 9.161 Å    a = 90°. |

|                                   |                                             |                     |
|-----------------------------------|---------------------------------------------|---------------------|
|                                   | $b = 6.008 \text{ \AA}$                     | $b = 90.32^\circ$ . |
|                                   | $c = 28.752 \text{ \AA}$                    | $g = 90^\circ$ .    |
| Volume                            | 1582.5 $\text{\AA}^3$                       |                     |
| Z                                 | 4                                           |                     |
| Density (calculated)              | 1.236 $\text{Mg/m}^3$                       |                     |
| Absorption coefficient            | 0.077 $\text{mm}^{-1}$                      |                     |
| F(000)                            | 632                                         |                     |
| Crystal size                      | 0.3 x 0.05 x 0.05 $\text{mm}^3$             |                     |
| Theta range for data collection   | 2.83 to 28.39°.                             |                     |
| Index ranges -                    | 12 ≤ h ≤ 10, -6 ≤ k ≤ 8, -38 ≤ l ≤ 32       |                     |
| Reflections collected             | 17358                                       |                     |
| Independent reflections           | 3900 [R(int) = 0.1345]                      |                     |
| Completeness to theta = 28.39°    | 98.3 %                                      |                     |
| Refinement method                 | Full-matrix least-squares on F <sup>2</sup> |                     |
| Data / restraints / parameters    | 3900 / 0 / 206                              |                     |
| Goodness-of-fit on F <sup>2</sup> | 1.168                                       |                     |
| Final R indices [I > 2σ(I)]       | R1 = 0.0928, wR2 = 0.2161                   |                     |
| R indices (all data)              | R1 = 0.1401, wR2 = 0.2571                   |                     |
| Largest diff. peak and hole       | 0.415 and -0.395 $\text{e.\AA}^{-3}$        |                     |

**Table S4.** Bond lengths [ $\text{\AA}$ ] and angles [ $^\circ$ ] for **2CB-NC4O**

|            |          |             |          |
|------------|----------|-------------|----------|
| C(1)-O(1)  | 1.417(4) | C(5)-H(11)  | 0.9900   |
| C(1)-C(2)  | 1.517(4) | C(6)-C(7)   | 1.511(4) |
| C(1)-H(2)  | 0.9900   | C(6)-H(12)  | 0.9900   |
| C(1)-H(3)  | 0.9900   | C(6)-H(13)  | 0.9900   |
| C(2)-C(3)  | 1.525(4) | C(7)-C(17)  | 1.393(5) |
| C(2)-H(4)  | 0.9900   | C(7)-C(8)   | 1.405(4) |
| C(2)-H(5)  | 0.9900   | C(8)-C(9)   | 1.386(4) |
| C(3)-C(4)  | 1.521(4) | C(8)-H(14)  | 0.9500   |
| C(3)-H(6)  | 0.9900   | C(9)-C(10)  | 1.389(5) |
| C(3)-H(7)  | 0.9900   | C(9)-H(15)  | 0.9500   |
| C(4)-N(1)  | 1.465(4) | C(10)-C(16) | 1.408(4) |
| C(4)-H(8)  | 0.9900   | C(10)-C(11) | 1.484(4) |
| C(4)-H(9)  | 0.9900   | C(11)-C(19) | 1.399(5) |
| C(5)-N(1)  | 1.473(4) | C(11)-C(12) | 1.402(4) |
| C(5)-C(6)  | 1.517(5) | C(12)-C(13) | 1.382(4) |
| C(5)-H(10) | 0.9900   | C(12)-H(16) | 0.9500   |

|                |          |                   |          |
|----------------|----------|-------------------|----------|
| C(13)-C(14)    | 1.389(5) | N(1)-C(5)-C(6)    | 109.4(2) |
| C(13)-H(17)    | 0.9500   | N(1)-C(5)-H(10)   | 109.8    |
| C(14)-C(18)    | 1.394(5) | C(6)-C(5)-H(10)   | 109.8    |
| C(14)-C(15)    | 1.447(5) | N(1)-C(5)-H(11)   | 109.8    |
| C(15)-N(2)     | 1.142(4) | C(6)-C(5)-H(11)   | 109.8    |
| C(16)-C(17)    | 1.380(4) | H(10)-C(5)-H(11)  | 108.2    |
| C(16)-H(18)    | 0.9500   | C(7)-C(6)-C(5)    | 116.7(3) |
| C(17)-H(19)    | 0.9500   | C(7)-C(6)-H(12)   | 108.1    |
| C(18)-C(19)    | 1.380(5) | C(5)-C(6)-H(12)   | 108.1    |
| C(18)-H(20)    | 0.9500   | C(7)-C(6)-H(13)   | 108.1    |
| C(19)-H(21)    | 0.9500   | C(5)-C(6)-H(13)   | 108.1    |
| N(1)-H(22)     | 0.96(4)  | H(12)-C(6)-H(13)  | 107.3    |
| O(1)-H(1)      | 0.82(5)  | C(17)-C(7)-C(8)   | 117.3(3) |
|                |          | C(17)-C(7)-C(6)   | 118.6(3) |
| O(1)-C(1)-C(2) | 112.3(3) | C(8)-C(7)-C(6)    | 124.1(3) |
| O(1)-C(1)-H(2) | 109.1    | C(9)-C(8)-C(7)    | 120.6(3) |
| C(2)-C(1)-H(2) | 109.1    | C(9)-C(8)-H(14)   | 119.7    |
| O(1)-C(1)-H(3) | 109.1    | C(7)-C(8)-H(14)   | 119.7    |
| C(2)-C(1)-H(3) | 109.1    | C(8)-C(9)-C(10)   | 121.8(3) |
| H(2)-C(1)-H(3) | 107.9    | C(8)-C(9)-H(15)   | 119.1    |
| C(1)-C(2)-C(3) | 112.4(3) | C(10)-C(9)-H(15)  | 119.1    |
| C(1)-C(2)-H(4) | 109.1    | C(9)-C(10)-C(16)  | 117.7(3) |
| C(3)-C(2)-H(4) | 109.1    | C(9)-C(10)-C(11)  | 122.5(3) |
| C(1)-C(2)-H(5) | 109.1    | C(16)-C(10)-C(11) | 119.8(3) |
| C(3)-C(2)-H(5) | 109.1    | C(19)-C(11)-C(12) | 117.6(3) |
| H(4)-C(2)-H(5) | 107.9    | C(19)-C(11)-C(10) | 121.2(3) |
| C(4)-C(3)-C(2) | 114.1(3) | C(12)-C(11)-C(10) | 121.1(3) |
| C(4)-C(3)-H(6) | 108.7    | C(13)-C(12)-C(11) | 121.3(3) |
| C(2)-C(3)-H(6) | 108.7    | C(13)-C(12)-H(16) | 119.4    |
| C(4)-C(3)-H(7) | 108.7    | C(11)-C(12)-H(16) | 119.4    |
| C(2)-C(3)-H(7) | 108.7    | C(12)-C(13)-C(14) | 119.8(3) |
| H(6)-C(3)-H(7) | 107.6    | C(12)-C(13)-H(17) | 120.1    |
| N(1)-C(4)-C(3) | 109.9(2) | C(14)-C(13)-H(17) | 120.1    |
| N(1)-C(4)-H(8) | 109.7    | C(13)-C(14)-C(18) | 120.0(3) |
| C(3)-C(4)-H(8) | 109.7    | C(13)-C(14)-C(15) | 120.6(3) |
| N(1)-C(4)-H(9) | 109.7    | C(18)-C(14)-C(15) | 119.4(3) |
| C(3)-C(4)-H(9) | 109.7    | N(2)-C(15)-C(14)  | 178.2(4) |
| H(8)-C(4)-H(9) | 108.2    | C(17)-C(16)-C(10) | 120.3(3) |

|                   |          |                   |          |
|-------------------|----------|-------------------|----------|
| C(17)-C(16)-H(18) | 119.8    | C(18)-C(19)-C(11) | 121.6(3) |
| C(10)-C(16)-H(18) | 119.8    | C(18)-C(19)-H(21) | 119.2    |
| C(16)-C(17)-C(7)  | 122.2(3) | C(11)-C(19)-H(21) | 119.2    |
| C(16)-C(17)-H(19) | 118.9    | C(4)-N(1)-C(5)    | 113.2(2) |
| C(7)-C(17)-H(19)  | 118.9    | C(4)-N(1)-H(22)   | 107(3)   |
| C(19)-C(18)-C(14) | 119.6(3) | C(5)-N(1)-H(22)   | 107(2)   |
| C(19)-C(18)-H(20) | 120.2    | C(1)-O(1)-H(1)    | 114(3)   |
| C(14)-C(18)-H(20) | 120.2    |                   |          |

---

Symmetry transformations used to generate equivalent atoms:

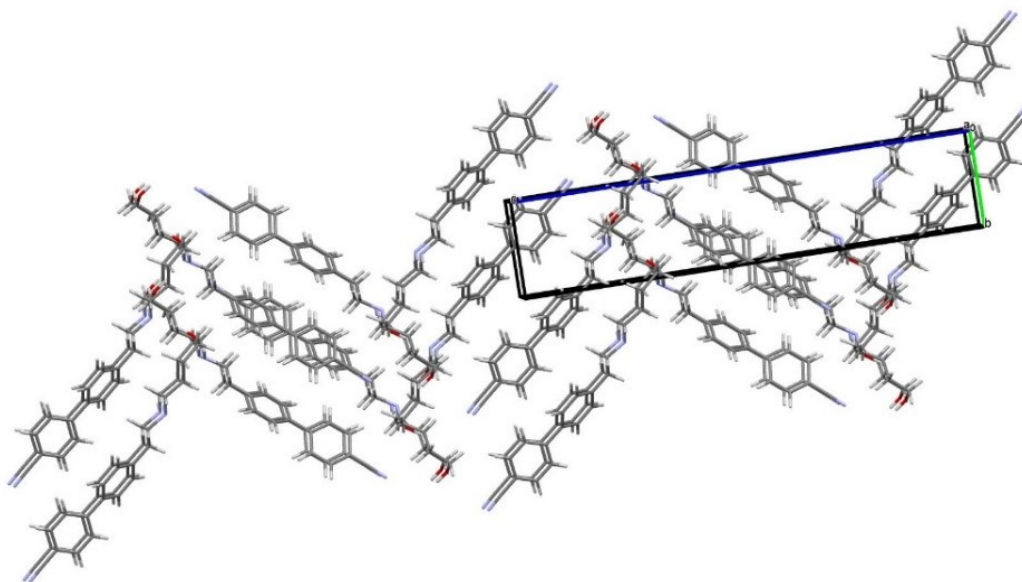

Fig. S3. The packing diagram of 2CB-NC4O alone with an axis in the size of 2\*2\*2 unit cell.

### 3. Synthesis and Characterization of the Molecules

#### Synthesis of 4-(4,4,5,5-tetramethyl-1,3,2-dioxaborolan-2-yl)benzeneethanol (**1**)

In a nitrogen atmosphere, a mixture of bis(pinacolato)diboron (3.04 g, 11.9 mmol) and Pd(dppf)Cl<sub>2</sub>•CH<sub>2</sub>Cl<sub>2</sub> (0.406 g, 0.497 mmol) in 1,4-dioxane was degassed with nitrogen for 30 min, and then 2-(4-bromophenyl)ethanol was added in flask by syringe. The mixture was heated up to react at 100 °C for 24 h. After cooling, the mixture was filtered over celite and washed with ethyl acetate. The filtrate was extracted with ethyl acetate and DI water. The organic phase was dried over MgSO<sub>4</sub> and concentrated by rotary evaporation. The residue was purified by column chromatography on silica gel with hexanes: ethyl acetate (30% to 70% ethyl acetate, by volume) as the eluent. Compound **1** was obtained as a yellow solid.

#### Synthesis of 4'-(2-hydroxyethyl)-(1,1'-biphenyl)-4-carbonitrile (**2**)

In a nitrogen atmosphere, a mixture of 4-bromobenzonitrile (0.176 g, 0.967 mmol), **1** (0.200 g, 0.806 mmol), Pd(PPh<sub>3</sub>)<sub>4</sub> (46.6 mg, 40.3 μmol) and K<sub>2</sub>CO<sub>3</sub> (0.667 g, 4.84 mmol) in a mixed solvent containing 4.8 mL toluene, 4.8 mL ethanol and 2.4 mL DI water was allowed to react at reflux condition for 2.5 h. After that, the reaction mixture was cooled down to room temperature and then extracted twice with ethyl acetate and DI water. The organic phase was dried over MgSO<sub>4</sub> and concentrated by rotary evaporation. The residue was purified by column chromatography on silica gel with hexanes: ethyl acetate (20% to 50% ethyl acetate, by volume) as the eluent. Compound **2** was obtained as a white solid (88.9% yield). <sup>1</sup>H NMR (600 MHz, CDCl<sub>3</sub>, ppm): δ 7.71 (d, *J* = 8.2 Hz, 2H), 7.66 (d, *J* = 8.2 Hz, 2H), 7.54 (d, *J* = 8.0 Hz, 2H), 7.35 (d, *J* = 8.0 Hz, 2H), 3.92 (t, *J* = 5.9 Hz, 2H), 2.93 (t, *J* = 6.5 Hz, 2H); <sup>13</sup>C NMR (150 MHz, CDCl<sub>3</sub>, ppm): δ 145.36, 139.40, 137.31, 132.57, 129.77, 127.51, 127.34, 118.92, 110.71, 63.43, 38.76; HRMS (EI) *m/z*: [M]<sup>+</sup> calcd for C<sub>15</sub>H<sub>13</sub>NO: 223.0997, found 223.0993.

### Synthesis of 4'-(2-bromoethyl)-(1,1'-biphenyl)-4-carbonitrile (**3**)

In a nitrogen atmosphere, a mixture of tetrabromomethane (0.297 g, 0.896 mmol) and **2** (0.100 g, 0.448 mmol) in 7.5 mL dichloromethane was cooled down to 0 °C, and then triphenylphosphine (0.235 g, 0.896 mmol) was added. The reaction mixture was allowed to react at room temperature for 1 h. After that, the reaction mixture was concentrated by rotary evaporation. The crude product was purified by column chromatography on silica gel with hexanes: dichloromethane (50% dichloromethane, by volume) as the eluent. Compound **3** was obtained as a white solid (89.8% yield). <sup>1</sup>H NMR (600 MHz, CDCl<sub>3</sub>, ppm): δ 7.72 (d, *J* = 8.1 Hz, 2H), 7.68 (d, *J* = 8.2 Hz, 2H), 7.56 (d, *J* = 8.0 Hz, 2H), 7.34 (d, *J* = 8.0 Hz, 2H), 3.62 (t, *J* = 7.4 Hz, 2H), 3.23 (t, *J* = 7.4 Hz, 2H); <sup>13</sup>C NMR (150 MHz, CDCl<sub>3</sub>, ppm): δ 145.19, 139.48, 137.75, 132.58, 129.43, 127.54, 127.39, 118.89, 110.86, 38.82, 32.61; HRMS (FAB) *m/z*: [M+H]<sup>+</sup> calcd for C<sub>15</sub>H<sub>13</sub>BrN: 286.0231, found 286.0235.

### Synthesis of 2CB-NC2O, 2CB-NC3O, and 2CB-NC4O

Compound 2CB-NC2O, 2CB-NC3O, and 2CB-NC4O were synthesized according to the same procedures. Only the preparation of 2CB-NC2O was described in detail.

### Synthesis of 2CB-NC2O

In a nitrogen atmosphere, a mixture of ethanolamine (0.630 mL, 10.5 mmol) and **3** (0.500 g, 1.75 mmol) in 2 mL ethanol was allowed to react at reflux condition overnight. After that, the reaction mixture was concentrated by rotary evaporation and then the crude product was purified by column chromatography on silica gel with MeOH: dichloromethane (95% dichloromethane, by volume) as the eluent. Compound **2CB-NC2O** was obtained as a yellow solid (65.1% yield). <sup>1</sup>H NMR (600 MHz, MeOD-*d*<sub>4</sub>, ppm): δ 7.80-7.77 (m, 4H), 7.63 (d, *J* = 7.7 Hz, 2H), 7.38 (d, *J* = 8.0 Hz, 2H), 3.67 (t, *J* = 5.4 Hz, 2H), 3.23 (m, 4H), 2.79 (t, *J* = 5.5 Hz, 2H); <sup>13</sup>C NMR (150 MHz, MeOD-*d*<sub>4</sub>, ppm): δ 146.98, 141.71, 138.65, 133.93, 130.73,

128.82, 128.58, 119.97, 111.86, 61.30, 52.24, 51.72, 36.25; HRMS (FAB)  $m/z$ :  $[M+H]^+$  calcd for  $C_{17}H_{19}N_2O$ : 267.1497, found 267.1493.

### Synthesis of 2CB-NC3O

A yellow-green viscous liquid (80.6% yield).  $^1H$  NMR (600 MHz, MeOD- $d_4$ , ppm):  $\delta$  7.80-7.76 (m, 4H), 7.62 (d,  $J = 8.2$  Hz, 2H), 7.36 (d,  $J = 8.2$  Hz, 2H), 3.62 (t,  $J = 6.2$  Hz, 2H), 3.32-3.30 (m, 4H), 2.76 (t,  $J = 7.1$  Hz, 2H), 1.76-1.72 (m, 2H);  $^{13}C$  NMR (150 MHz, MeOD- $d_4$ , ppm):  $\delta$  146.82, 141.70, 138.43, 133.76, 130.55, 128.65, 128.40, 119.82, 111.68, 61.47, 51.86, 47.90, 36.14, 32.74; HRMS (FAB)  $m/z$ :  $[M]^+$  calcd for  $C_{18}H_{21}N_2O$ : 281.1654, found 281.1647.

### Synthesis of 2CB-NC4O

A yellow solid (53.4% yield).  $^1H$  NMR (600 MHz, MeOD- $d_4$ , ppm):  $\delta$  7.80-7.77 (m, 4H), 7.63 (d,  $J = 8.2$  Hz, 2H), 7.36 (d,  $J = 8.2$  Hz, 2H), 3.56 (t,  $J = 6.1$  Hz, 2H), 2.91-2.86 (m, 4H), 2.66 (t,  $J = 6.8$  Hz, 2H), 1.62-1.53 (m, 4H);  $^{13}C$  NMR (150 MHz, MeOD- $d_4$ , ppm):  $\delta$  146.84, 141.78, 138.43, 133.76, 130.54, 128.66, 128.40, 119.82, 111.70, 62.72, 51.80, 50.32, 36.20, 31.55, 27.06; HRMS (FAB)  $m/z$ :  $[M]^+$  calcd for  $C_{19}H_{23}N_2O$ : 295.1810, found 295.1805.

## 4. Theoretical Calculation

The theoretical calculations of the bimolecular structure for 2CB-NC2O, 2CB-NC3O, 2CB-NC4O, and 5CB were calculated by the Gaussian 16 software. The molecular model is optimized by the density functional theory (DFT) B3LYP-D3 with the basis set of 6-31g(d)+ for C/H/O/N atoms.<sup>1</sup>

### References:

1. J. Witte, M. Goldey, J. B. Neaton, M. H.-Gordon, *J. Chem. Theory Comput.* 2015, **11**, 1481–1492.

## 5. $^1\text{H}$ and $^{13}\text{C}$ NMR spectra

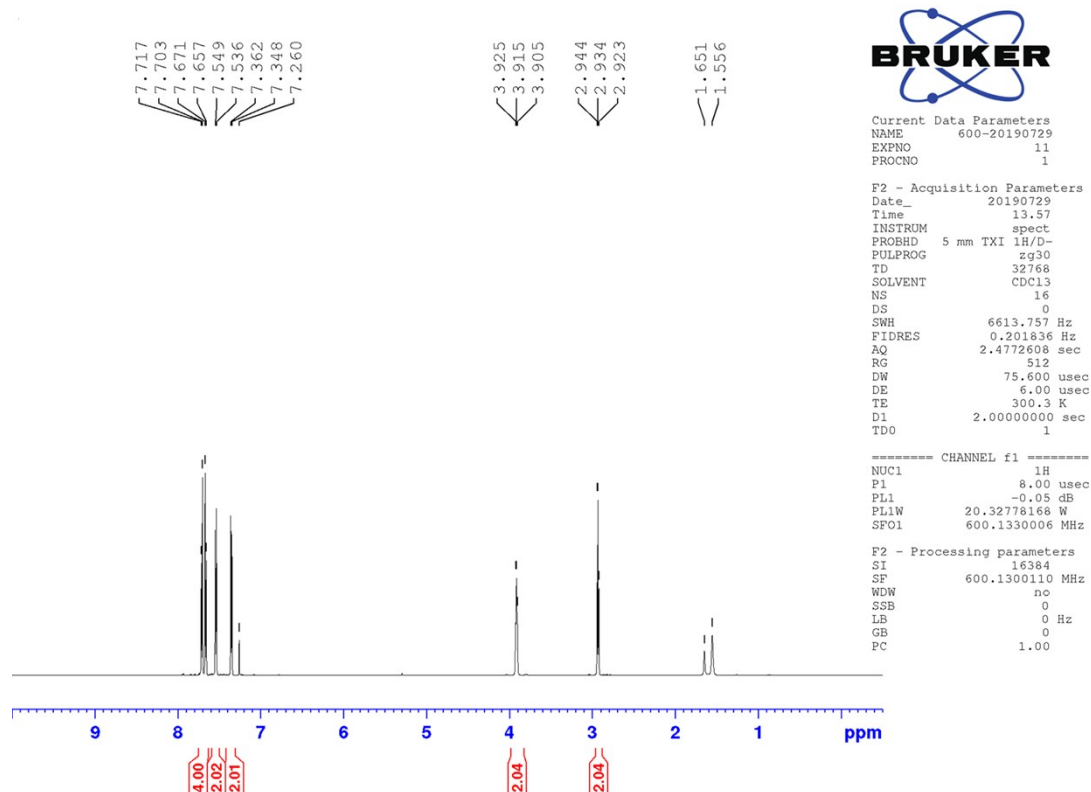

Fig. S4.  $^1\text{H}$  NMR spectra of **2** in  $\text{CDCl}_3$ .

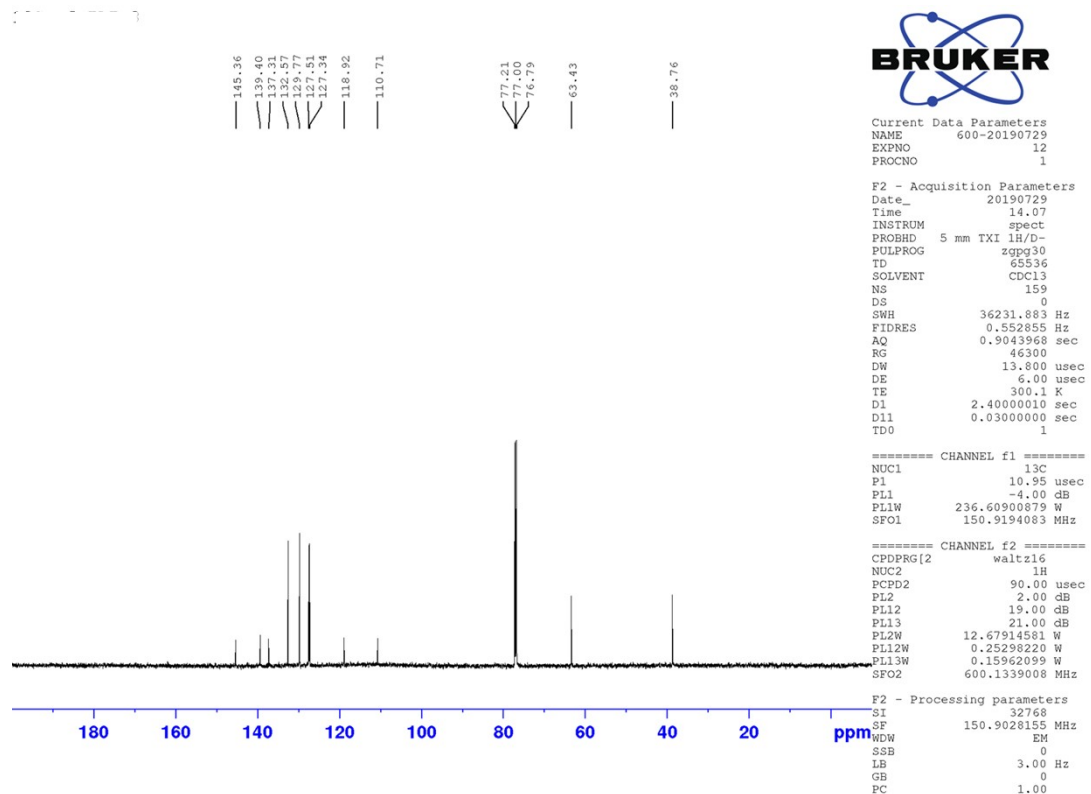

Fig. S5.  $^{13}\text{C}$  NMR spectra of **2** in  $\text{CDCl}_3$ .



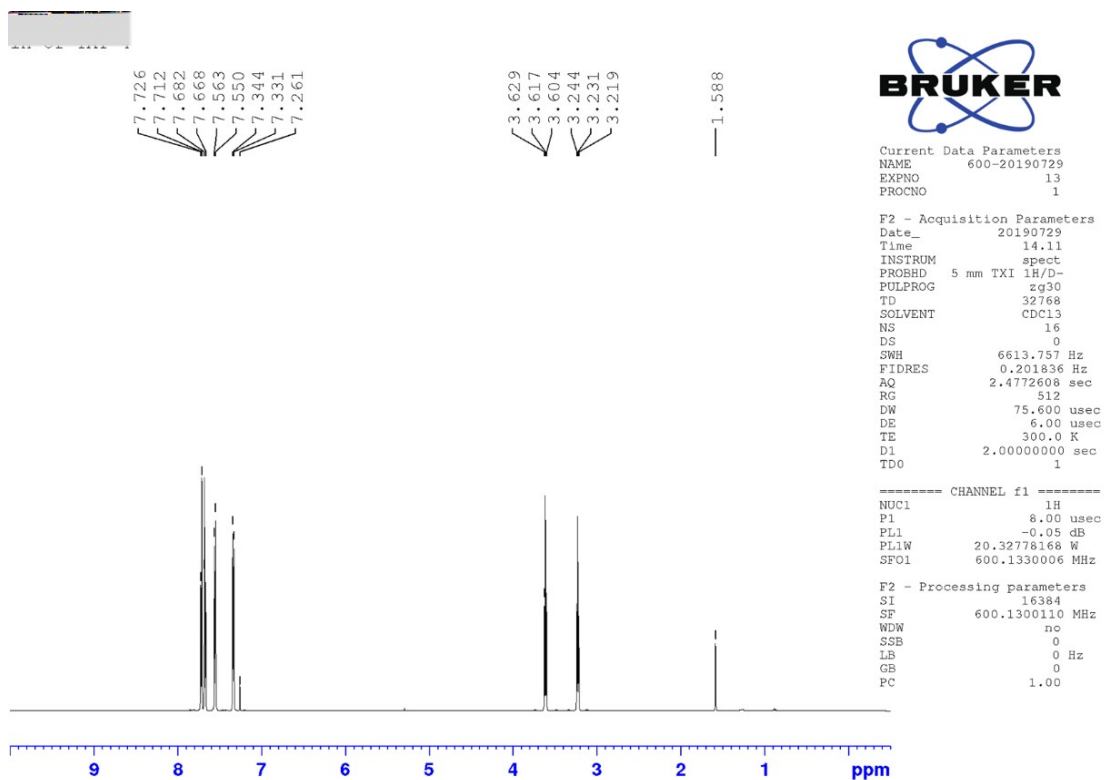

Fig. S6.  $^1\text{H}$  NMR spectra of **3** in  $\text{CDCl}_3$ .

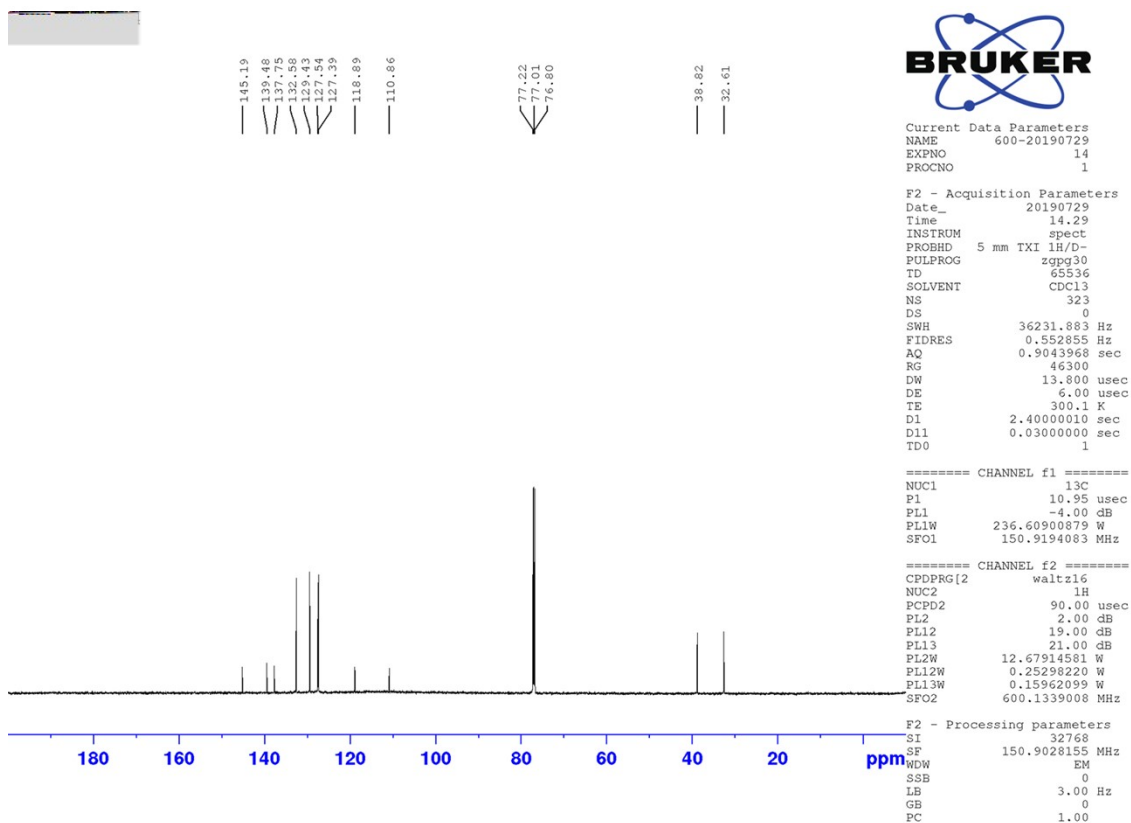

Fig. S7.  $^{13}\text{C}$  NMR spectra of **3** in  $\text{CDCl}_3$ .

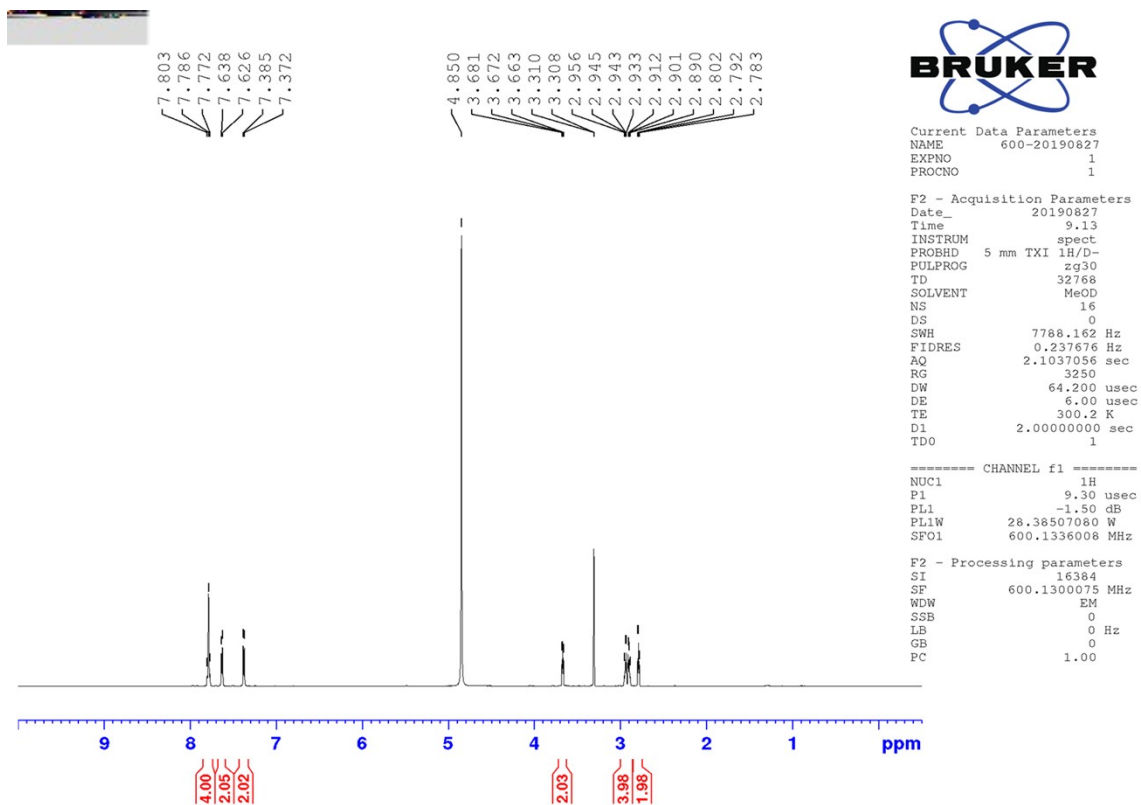

Fig. S8.  $^1\text{H}$  NMR spectra of **2CB-NC2O** in  $\text{MeOD-}d_4$ .

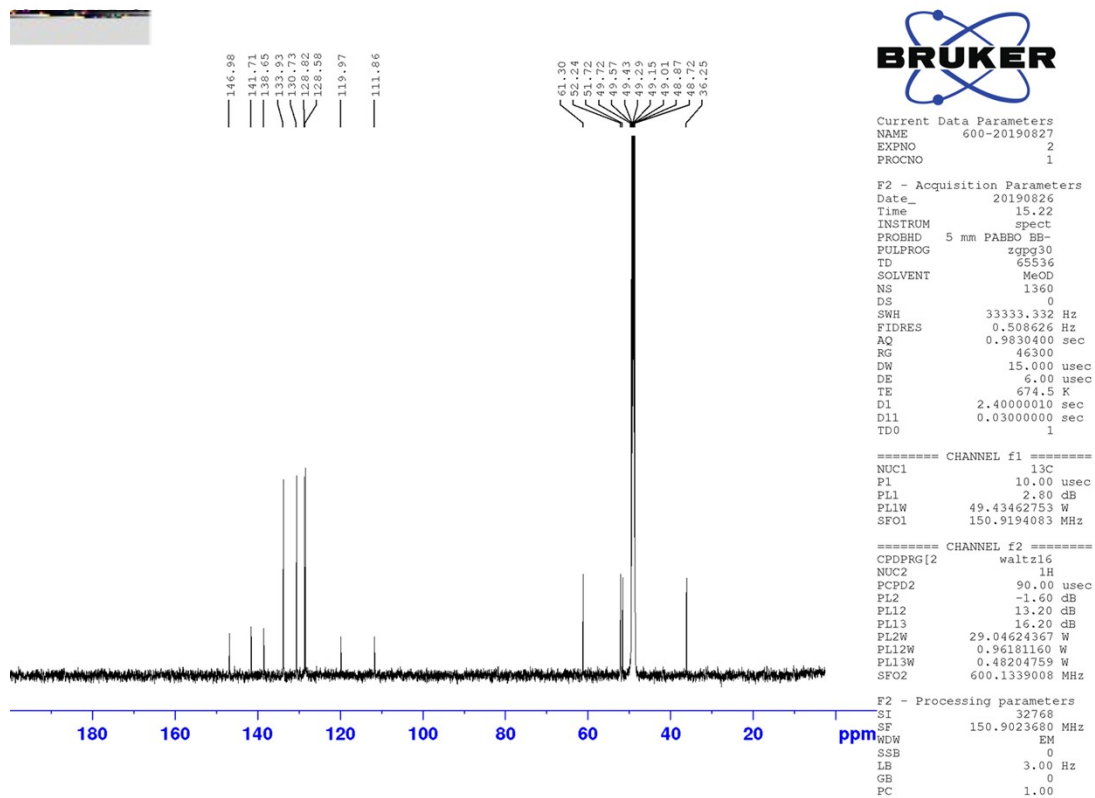

Fig. S9.  $^{13}\text{C}$  NMR spectra of **2CB-NC2O** in  $\text{MeOD-}d_4$ .

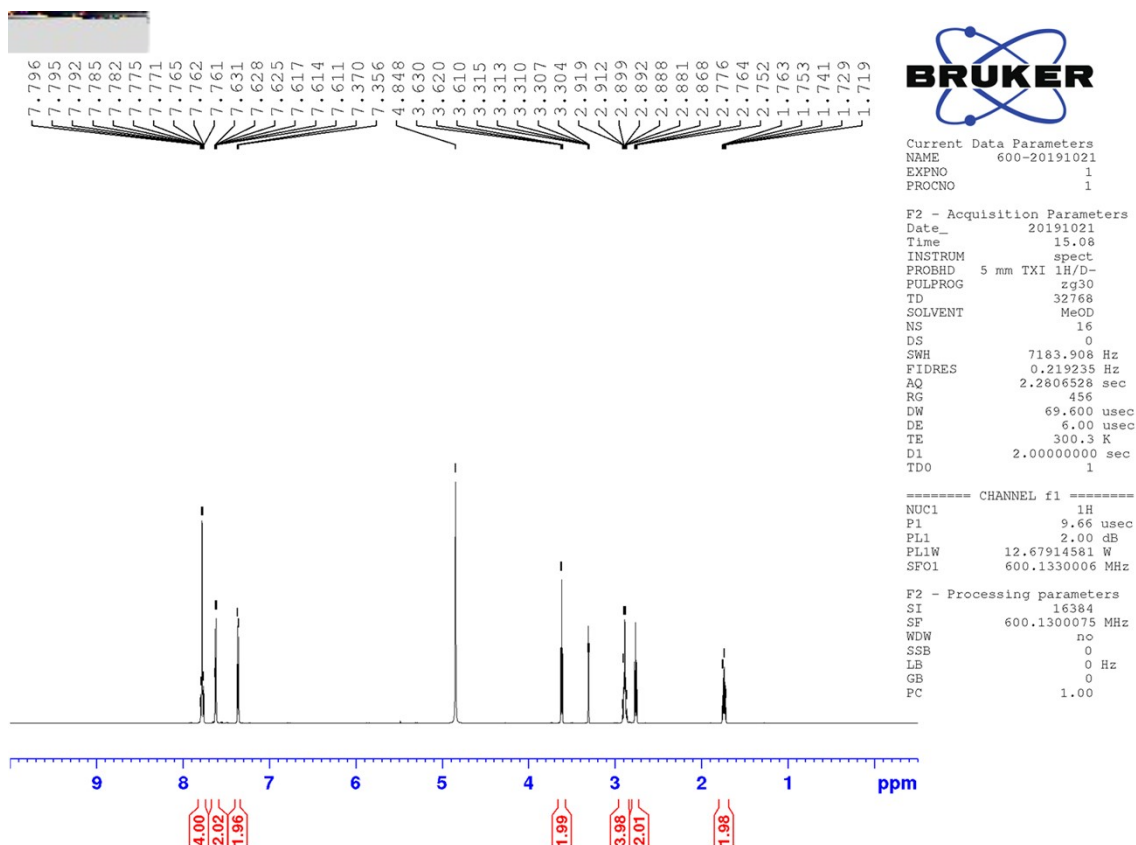

Fig. S10. <sup>1</sup>H NMR spectra of 2CB-NC3O in MeOD-*d*<sub>4</sub>.

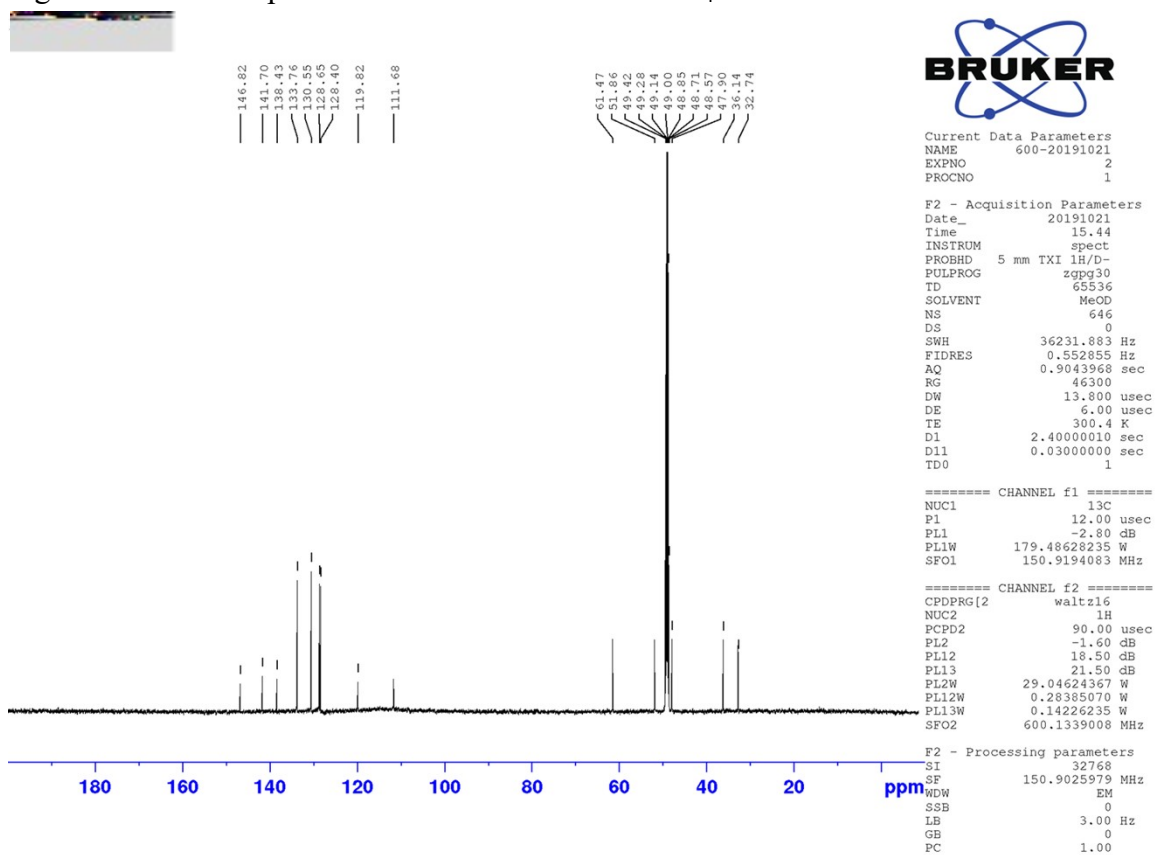

Fig. S11. <sup>13</sup>C NMR spectra of 2CB-NC3O in MeOD-*d*<sub>4</sub>.

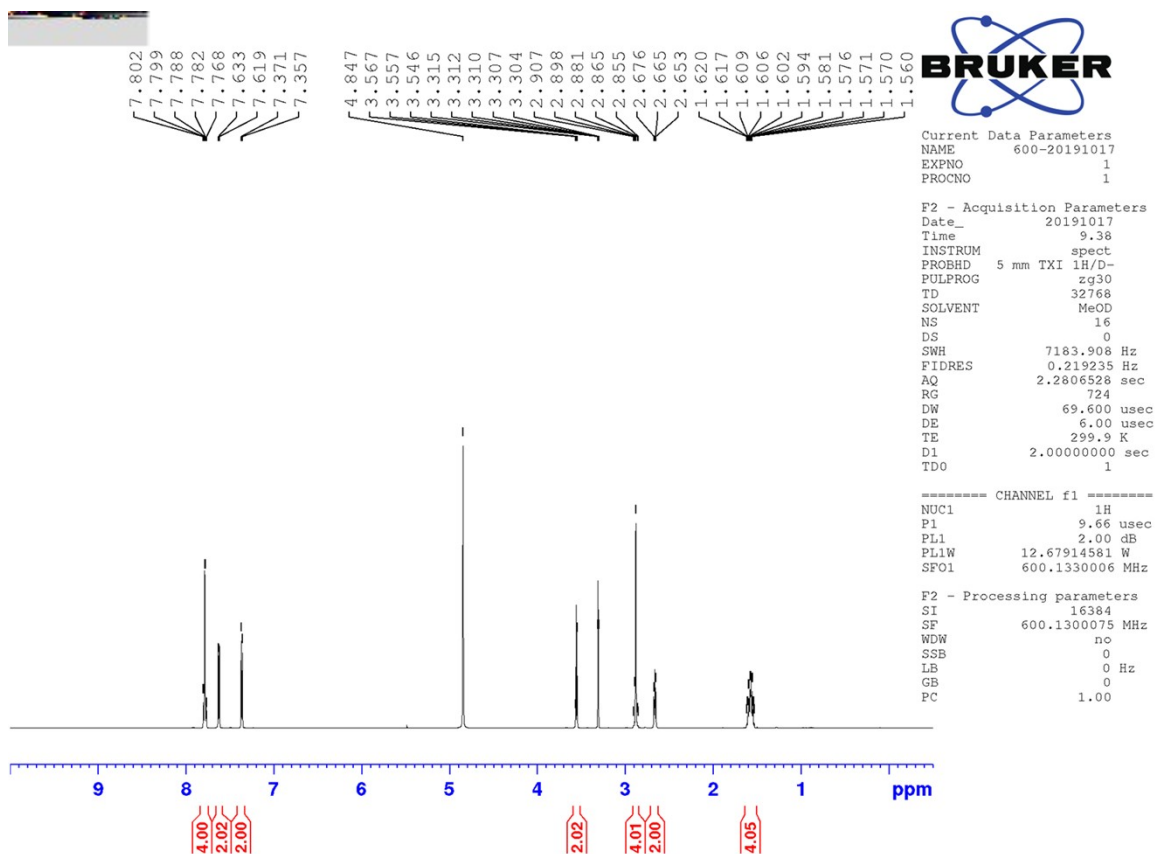

Fig. S12.  $^1\text{H}$  NMR spectra of **2CB-NC4O** in  $\text{MeOD-}d_4$ .

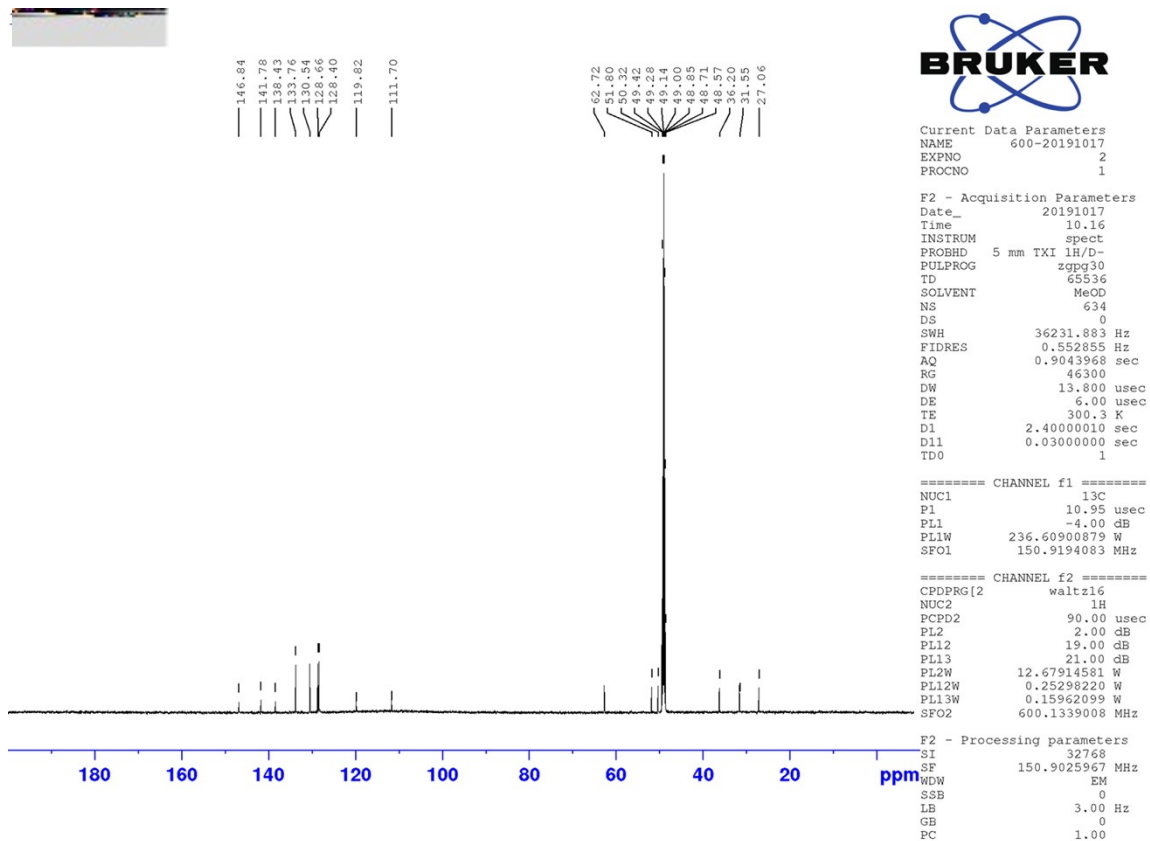

Fig. S13.  $^{13}\text{C}$  NMR spectra of **2CB-NC4O** in  $\text{MeOD-}d_4$ .
